# Supplementary material
Source: ML conference proceedings conference paper supplement (https://www.ecva.net/papers/eccv_2022/papers_ECCV/html/136810258_ECCV_2022_paper.php)
Supplement: Supplementary file 1 [file 136810258-supp.pdf]

# LA3: Efficient Label-Aware AutoAugment

Mingjun Zhao<sup>1</sup>, Shan Lu<sup>1</sup>, Zixuan Wang<sup>2</sup>, Xiaoli Wang<sup>2</sup> and Di Niu<sup>1</sup>

<sup>1</sup> University of Alberta

<sup>2</sup> Platform and Content Group, Tencent

{zhao2,slu1,dniu}@ualberta.ca, {zackiewang,evexlwang}@tencent.com

## 1 Training Details of LA3

**Table 1.** Training hyperparameters for different networks on CIFAR-10, CIFAR-100 and ImageNet.

| Dataset   | Model                   | Batch Size       | LR   | WD     | Epoch |
|-----------|-------------------------|------------------|------|--------|-------|
| CIFAR-10  | WRN-40-2                | 128              | 0.1  | $5e-4$ | 600   |
|           | WRN-28-10               | 128              | 0.1  | $5e-4$ | 200   |
|           | Shake-Shake (26 2x96d)  | 128              | 0.01 | $1e-3$ | 1,800 |
|           | Shake-Shake (26 2x112d) | 128              | 0.01 | $1e-3$ | 1,800 |
|           | PyramidNet+ShakeDrop    | 128              | 0.1  | $5e-4$ | 1,800 |
| CIFAR-100 | WRN-40-2                | 128              | 0.1  | $5e-4$ | 600   |
|           | WRN-28-10               | 128              | 0.1  | $5e-4$ | 200   |
|           | Shake-Shake (26 2x96d)  | 128              | 0.05 | $5e-4$ | 1,800 |
|           | PyramidNet+ShakeDrop    | 128              | 0.05 | $5e-4$ | 1,800 |
| ImageNet  | ResNet-50               | 1,024            | 0.4  | $1e-4$ | 270   |
|           | ResNet-50 (BA)          | $1,024 \times 4$ | 0.4  | $1e-4$ | 270   |

In this section, we present the details of training hyperparameters of different target networks on CIFAR-10, CIFAR-100 and ImageNet.

For CIFAR-10 and CIFAR-100, we follow previous work and apply our searched policies on top of the baseline augmentations including random cropping the input image to  $32 \times 32$  from the padded image, horizontally flipping it with 0.5 probability, and a Cutout operation with  $16 \times 16$  pixels. For ImageNet, the searched policies are applied after random cropping, resizing to  $224 \times 224$ , and horizontal flipping with 0.5 probability.

All the networks are trained with SGD optimizer and cosine learning rate decay. In the training of ResNet-50 model, label smoothing is set to 0.1. Other training hyperparameters are shown in Table 1. In the Batch Augment (BA) version of ResNet-50, a training batch is composed of 4 copies of augmented 1,024 samples.

## 2 Choice of $\alpha$

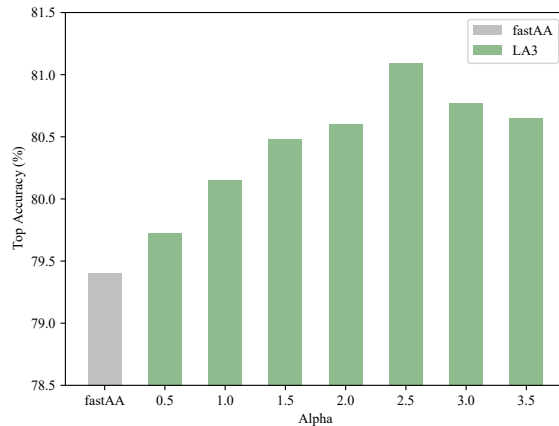

**Fig. 1.** The top-1 test accuracy of WRN-40-2 on CIFAR-100 verses different  $\alpha$  values.

In our method,  $\alpha$  is a hyperparameter in score calculation of augmentation triples to adjust the weight between the reward value and the redundancy value. To choose the optimal  $\alpha$ , we evaluate the performance of our proposed method with WRN-40-2 network on CIFAR-100 verses different  $\alpha$  values from 0.5 to 3.5. From Figure 1, we can observe that the test accuracy increases with  $\alpha$  before  $\alpha = 2.5$  and decreases after. Therefore, we chose  $\alpha = 2.5$  in our experiments. Note that our *LA3* method constantly beats FastAA with all choices of  $\alpha$  values, which again confirms the effectiveness of our design.

## 3 Results on ViT

We have also conducted an experiment on ViT-Tiny to evaluate our *LA3* method. Due to unavailability of many baselines, we only include comparison results with two static methods, AA and FastAA. As shown in the following Table 2, *LA3* is effective and outperforms AA and FastAA on ViT-Tiny.

**Table 2.** ViT-Tiny top-1 accuracy on CIFAR-10 and CIFAR-100.

|           | base  | AA    | FastAA | LA3          |
|-----------|-------|-------|--------|--------------|
| CIFAR-10  | 86.07 | 87.39 | 86.83  | <b>87.83</b> |
| CIFAR-100 | 97.49 | 98.03 | 97.93  | <b>98.08</b> |
